# Supplementary material
Source: HighWire-hosted journal article supplement (https://jnm.snmjournals.org/highwire/filestream/95299/field_highwire_adjunct_files/0/201095_Supplemental_Data.pdf)

## SUPPLEMENTAL DATA

**Supplemental Table 1.** Densities and corresponding materials elemental compositions of simulated multiple VSVs.

| Medium            | Density<br>[g/cm <sup>3</sup> ] | Elemental % mass composition |      |      |      |     |     |      |     |     |     |     |      |
|-------------------|---------------------------------|------------------------------|------|------|------|-----|-----|------|-----|-----|-----|-----|------|
|                   |                                 | H                            | C    | N    | O    | Na  | Mg  | P    | S   | Cl  | Ar  | K   | Ca   |
| <b>Air</b>        | 0.00129                         | 0.0                          | 0.0  | 75.5 | 23.2 | 0.0 | 0.0 | 0.0  | 0.0 | 0.0 | 1.3 | 0.0 | 0.0  |
| <b>Medium 1</b>   | 0.1                             | 10.3                         | 10.5 | 3.1  | 74.9 | 0.2 | 0.0 | 0.2  | 0.3 | 0.3 | 0.0 | 0.2 | 0.0  |
| <b>Lung</b>       | 0.26                            | 10.3                         | 10.5 | 3.1  | 74.9 | 0.2 | 0.0 | 0.2  | 0.3 | 0.3 | 0.0 | 0.2 | 0.0  |
| <b>Medium 2</b>   | 0.3                             | 10.3                         | 10.5 | 3.1  | 74.9 | 0.2 | 0.0 | 0.2  | 0.3 | 0.3 | 0.0 | 0.2 | 0.0  |
| <b>Medium 3</b>   | 0.4                             | 10.3                         | 10.5 | 3.1  | 74.9 | 0.2 | 0.0 | 0.2  | 0.3 | 0.3 | 0.0 | 0.2 | 0.0  |
| <b>Medium 4</b>   | 0.5                             | 10.3                         | 10.5 | 3.1  | 74.9 | 0.2 | 0.0 | 0.2  | 0.3 | 0.3 | 0.0 | 0.2 | 0.0  |
| <b>Medium 5</b>   | 0.6                             | 10.3                         | 10.5 | 3.1  | 74.9 | 0.2 | 0.0 | 0.2  | 0.3 | 0.3 | 0.0 | 0.2 | 0.0  |
| <b>Medium 6</b>   | 0.7                             | 10.3                         | 10.5 | 3.1  | 74.9 | 0.2 | 0.0 | 0.2  | 0.3 | 0.3 | 0.0 | 0.2 | 0.0  |
| <b>Medium 7</b>   | 0.8                             | 10.3                         | 10.5 | 3.1  | 74.9 | 0.2 | 0.0 | 0.2  | 0.3 | 0.3 | 0.0 | 0.2 | 0.0  |
| <b>Medium 8</b>   | 0.9                             | 11.6                         | 68.1 | 0.2  | 19.8 | 0.1 | 0.0 | 0.0  | 0.1 | 0.1 | 0.0 | 0.0 | 0.0  |
| <b>Water</b>      | 1.0                             | 11.1                         | 0.0  | 0.0  | 88.9 | 0.0 | 0.0 | 0.0  | 0.0 | 0.0 | 0.0 | 0.0 | 0.0  |
| <b>Medium 9</b>   | 1.1                             | 9.4                          | 20.7 | 6.2  | 62.2 | 0.6 | 0.0 | 0.0  | 0.6 | 0.3 | 0.0 | 0.0 | 0.0  |
| <b>Medium 10</b>  | 1.2                             | 8.2                          | 39.1 | 2.9  | 37.2 | 0.1 | 0.0 | 3.9  | 0.1 | 0.1 | 0.0 | 0.1 | 8.3  |
| <b>Medium 11</b>  | 1.3                             | 7.1                          | 33.5 | 3.2  | 38.7 | 0.1 | 0.1 | 5.4  | 0.2 | 0.0 | 0.0 | 0.0 | 11.7 |
| <b>Bone</b>       | 1.42                            | 6.3                          | 26.1 | 3.9  | 43.6 | 0.1 | 0.1 | 6.1  | 0.3 | 0.1 | 0.0 | 0.1 | 13.3 |
| <b>Medium 12</b>  | 1.5                             | 5.6                          | 26.5 | 3.6  | 40.5 | 0.1 | 0.2 | 7.3  | 0.3 | 0.0 | 0.0 | 0.0 | 15.9 |
| <b>Medium 13</b>  | 1.6                             | 5.2                          | 24.6 | 3.7  | 41.1 | 0.1 | 0.2 | 7.8  | 0.3 | 0.0 | 0.0 | 0.0 | 17.0 |
| <b>Medium 14</b>  | 1.7                             | 4.5                          | 21.0 | 3.9  | 42.0 | 0.1 | 0.2 | 8.8  | 0.3 | 0.0 | 0.0 | 0.0 | 19.2 |
| <b>Medium 1a5</b> | 1.8                             | 3.9                          | 17.9 | 4.1  | 42.9 | 0.1 | 0.2 | 9.6  | 0.3 | 0.0 | 0.0 | 0.0 | 21.0 |
| <b>Medium 16</b>  | 1.9                             | 3.4                          | 15.5 | 4.2  | 43.5 | 0.1 | 0.2 | 10.3 | 0.3 | 0.0 | 0.0 | 0.0 | 22.5 |

**Supplemental Table 2.** Organ-level voxel dose errors for VSV approaches.

|                       | <b>Organ-level voxel dose % difference = <math>\frac{\text{Method} - \text{direct Monte Carlo}}{\text{direct Monte Carlo}} \times 100</math> [%]</b> |                     |                     |                     |                      |                      |
|-----------------------|------------------------------------------------------------------------------------------------------------------------------------------------------|---------------------|---------------------|---------------------|----------------------|----------------------|
| <b>Methods</b>        | <b><i>N</i> = 1</b>                                                                                                                                  | <b><i>N</i> = 4</b> | <b><i>N</i> = 6</b> | <b><i>N</i> = 8</b> | <b><i>N</i> = 10</b> | <b><i>N</i> = 20</b> |
| Gallbladder wall      | -1.64                                                                                                                                                | -0.99               | -0.67               | -0.7                | -0.76                | -1.01                |
| Heart wall            | -4.68                                                                                                                                                | 0.43                | 1.98                | 1.57                | 0.51                 | 0.1                  |
| Kidney                | 2.11                                                                                                                                                 | 2.11                | 2.74                | 2.75                | 2.74                 | 2.74                 |
| Liver                 | 1.44                                                                                                                                                 | 1.66                | 1.75                | 1.78                | 1.71                 | 1.54                 |
| Lung                  | -57.61                                                                                                                                               | 10.48               | 10.7                | 4.58                | 2.72                 | -0.63                |
| Pancreas              | 1.33                                                                                                                                                 | 1.5                 | 1.71                | 1.72                | 1.69                 | 1.67                 |
| Spleen                | 0.73                                                                                                                                                 | 1.15                | 1.52                | 1.62                | 1.43                 | 1.34                 |
| Stomach wall          | -3.96                                                                                                                                                | 2.32                | 3.27                | 3.12                | 2.58                 | 0.66                 |
| Whole body            | -10.55                                                                                                                                               | -0.19               | 1.46                | 0.77                | 0.27                 | -2.59                |
| Average (organs only) | -7.79                                                                                                                                                | 2.33                | 2.87                | 2.06                | 1.58                 | 0.80                 |

**Supplemental Fig. 1.** Errors at the voxel-level represented in (A) relative and (B) absolute differences. Difference maps were generated for the single VSV and multiple VSVs with  $N = 4, 6, 8, 10,$  and  $20$ , where the direct Monte Carlo (ground truth).

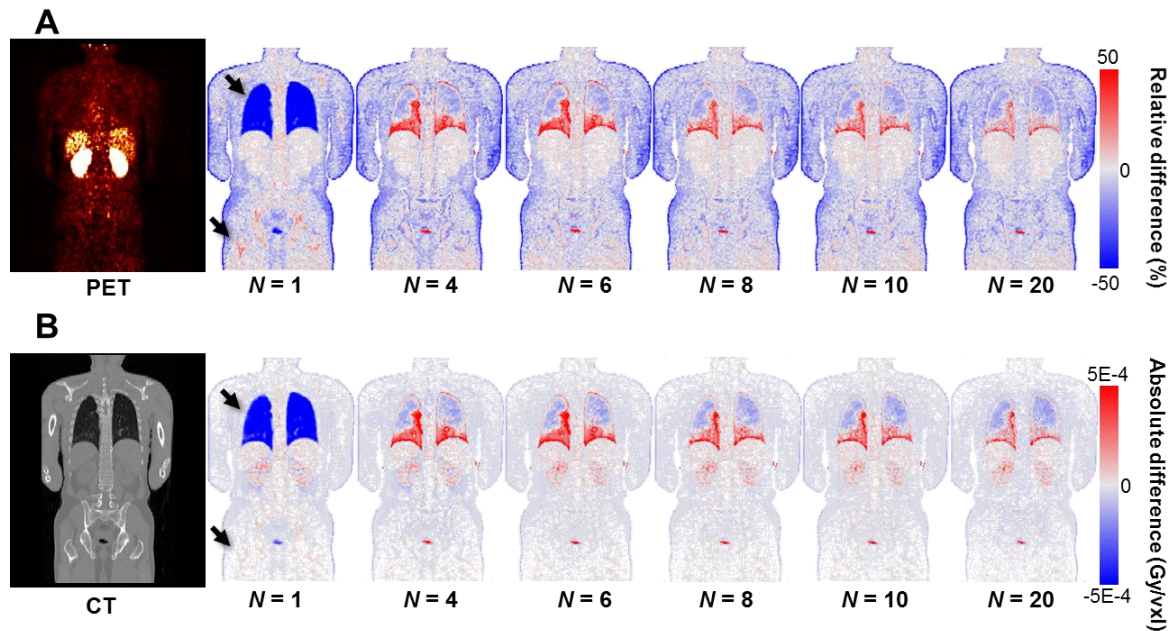

Supplement: 201095_Supplemental_Data.pdf [file 201095_Supplemental_Data.pdf]
